# Supplementary material
Source: Research Square preprint supplement (doi:10.21203/rs.3.rs-10283467/v1)
Supplement: Supplementary file 1 [file 070ac6d7551de3fc5dea060a.docx]

**Table 1**

These are the most important blood tests

|  | **What it Indicates in Cirrhosis** | **Test** |
| --- | --- | --- |
| **ALT (SGPT)** | Liver cell damage (may be normal in advanced cirrhosis) | - |
| **AST (SGOT)** | Often higher than ALT in cirrhosis | - |
| **ALP** | Bile duct damage | - |
| **Total & Direct Bilirubin** | ↑ causes jaundice | - |
| **Albumin** | ↓ indicates poor liver function | - |
| **Total Protein** | ↓ in chronic liver disease | - |
| **Test** | - | - |

**Table 2**

|  |  | **Test** | **Finding** |
| --- | --- | --- | --- |
| **Prothrombin** **Time (PT)** | Prolonged | NA | NA |
| **INR** | Increased (key marker of severity) | NA | NA |
| **Test** | - | - | - |
| **Finding** | - | - | - |

**Table 3**

| **Parameter** | **Finding** |
| --- | --- |
| **Platelet count** | ↓ (early sign of cirrhosis) |
| **Hemoglobin, WBC** | ↓ (anemia) |

**Table 4**

| **Numerical** | N_Days, Age, Bilirubin, Cholesterol, Albumin, Copper, Alk_Phos, SGOT, Tryglicerides, Platelets, Prothrombin, Stage |
| --- | --- |

| **Categorical** | Status, Drug, Sex, Ascites, Hepatomegaly, Spiders, Edema |
| --- | --- |

This is generally numeric (int or float), and most classification models try to predict it.

### Table 5

### Categorical (Non-Numeric) Features: These are typically encoded later for ML (e.g., label encoding or one-hot encoding).

| **Feature** | **Type** | **Description** |
| --- | --- | --- |
| **Status** | Categorical | Patient status category (e.g., compensated vs decompensated) |
| **Drug** | Categorical | Type of medication or drug treatment |
| **Sex** | Categorical | Patient’s gender |
| **Ascites** | Categorical | Whether ascites (fluid in abdomen) is present |
| **Hepatomegaly** | Categorical | Whether liver enlargement is present |
| **Spiders** | Categorical | Presence of spider angiomas (skin vascular signs) |
| **Edema** | Categorical | Presence of edema (fluid/ swelling) |

### Table 6

Numerical Features, Measured clinically — many are blood test results.

| **Feature** | **Type** | **Description** |
| --- | --- | --- |
| **N_Days** | Integer | Number of days since reference (e.g., registration) |
| **Age** | Integer | Age of patient (in days or years depending on dataset version) |
| **Bilirubin** | Float | Bilirubin level in blood (indicator of liver function) |
| **Cholesterol** | Float | Cholesterol measure |

| **Albumin** | Float | Albumin level (protein produced by liver) |
| --- | --- | --- |
| **Copper** | Float | Copper level |
| **Alk_Phos** | Float | Alkaline phosphatase (liver enzyme) |
| **SGOT** | Float | Serum glutamic-oxaloacetic transaminase (liver enzyme) |
| **Tryglicerides** | Float | Triglycerides level in blood |
| **Platelets** | Float | Platelet count in blood |
| **Prothrombin** | Float | Prothrombin time (blood clotting measure) |
| **Stage** | Integer/Float | **Target label** — stage of liver cirrhosis |

**Table 7**

### Example Correlation Matrix (Pearson’s r).

| **Feature 1** | **Feature 2** | **Correlation** | **Interpretation** |
| --- | --- | --- | --- |
|  | Direct Bilirubin | +0.88 | Strong positive correlation – direct bilirubin is a component of total bilirubin. |
| Albumin | A/G Ratio | +0.72 | Strong positive – albumin directly influences the A/G ratio. |
| ALT | AST | +0.81 | Strong positive – both are liver enzymes elevated in liver damage. |
| Total Protein | Albumin | +0.69 | Moderate to strong positive – albumin contributes to total protein. |
| Age | Other Attributes | +0.25 | Weak positive – age has a limited direct linear association. Attributes. |

**Table 8**

MODEL: Logistic Regression

Classification Report.

|  | **Precision** | **recall** | **f1-score** | **support** |
| --- | --- | --- | --- | --- |
| **1** | 0.50 | 0.52 | 0.51 | 2480 |
| **2** | 0.50 | 0.47 | 0.49 | 2532 |
| **3** | 0.63 | 0.65 | 0.64 | 2488 |
| **Accuracy** |  |  | 0.55 | 7500 |
| **macro avg** | 0.55 | 0.55 | 0.55 | 7500 |
| **weighted avg** | 0.55 | 0.55 | 0.55 | 7500 |

**Table 9**

MODEL: KNN

Classification Report.

|  | **Precision** | **Recall** | **f1-score** | **support** |
| --- | --- | --- | --- | --- |
| 1 | 0.86 | 0.87 | 0.87 | 2480 |
| 2 | 0.85 | 0.87 | 0.86 | 2532 |
| 3 | 0.92 | 0.90 | 0.91 | 2488 |
| Accuracy |  |  | 0.88 | 7500 |
| macro avg | 0.88 | 0.88 | 0.88 | 7500 |
| weighted avg | 0.88 | 0.88 | 0.88 | 7500 |

**Table 10**

MODEL: SVM

Classification Repo

|  | **Precision** | **Recall** | **f1-score** | **Support** |
| --- | --- | --- | --- | --- |
| **1** | 0.75 | 0.72 | 0.74 | 2480 |
| **2** | 0.69 | 0.75 | 0.72 | 2532 |
| **3** | 0.84 | 0.81 | 0.82 | 2488 |
| **Accuracy** |  |  | 0.76 | 7500 |
| **macro avg** | 0.76 | 0.76 | 0.76 | 7500 |
| **weighted avg** | 0.76 | 0.76 | 0.76 | 7500 |

**Table 11**

MODEL: Random Forest

|  | **Precision** | **Recall** | **f1-score** | **Support** |
| --- | --- | --- | --- | --- |
| **1** | 0.95 | 0.94 | 0.94 | 2480 |
| **2** | 0.93 | 0.94 | 0.94 | 2532 |
| **3** | 0.96 | 0.96 | 0.96 | 2488 |
| **Accuracy** |  |  | 0.95 | 7500 |
| **macro avg** | 0.95 | 0.95 | 0.95 | 7500 |
| **weighted avg** | 0.95 | 0.95 | 0.95 | 7500 |

Classification Report

**Table 12**

MODEL: Naive Bayes

Classification Report.

|  | **Precision** | **recall** | **f1-score** | **support** |
| --- | --- | --- | --- | --- |
| **1** | 0.41 | 0.78 | 0.54 | 2480 |
| **2** | 0.45 | 0.17 | 0.25 | 2532 |
| **3** | 0.63 | 0.45 | 0.53 | 2488 |
| **Accuracy** |  |  | 0.47 | 7500 |
| **macro avg** | 0.50 | 0.47 | 0.44 | 7500 |
| **weighted avg** | 0.50 | 0.47 | 0.44 | 7500 |

**Table 13**

MODEL: AdaBoost

Classification Report.

|  | **Precision** | **recall** | **f1-score** | **Support** |
| --- | --- | --- | --- | --- |
| **1** | 0.59 | 0.56 | 0.57 | 2480 |
| **2** | 0.56 | 0.57 | 0.56 | 2532 |
| **3** | 0.66 | 0.67 | 0.67 | 2488 |
| **Accuracy** |  |  | 0.60 | 7500 |
| **macro avg** | 0.60 | 0.60 | 0.60 | 7500 |
| **weighted avg** | 0.60 | 0.60 | 0.60 | 7500 |

**Table 14**

MODEL: Gradient Boosting

Classification Report.

|  | **precision** | **recall** | **f1-score** | **Support** |
| --- | --- | --- | --- | --- |
| **1** | 0.85 | 0.80 | 0.83 | 2480 |
| **2** | 0.79 | 0.83 | 0.81 | 2532 |
| **3** | 0.87 | 0.88 | 0.87 | 2488 |
| **Accuracy** |  |  | 0.84 | 7500 |
| **macro avg** | 0.84 | 0.84 | 0.84 | 7500 |
| **weighted avg** | 0.84 | 0.84 | 0.84 | 7500 |

**Table 15**

MODEL: MLP Classifier

Classification Report.

|  | **precision** | **Recall** | **f1-score** | **support** |
| --- | --- | --- | --- | --- |
| **1** | 0.83 | 0.79 | 0.81 | 2480 |
| **2** | 0.80 | 0.82 | 0.81 | 2532 |
| **3** | 0.87 | 0.89 | 0.88 | 2488 |
| **Accuracy** |  |  | 0.83 | 7500 |
| **macro avg** | 0.83 | 0.83 | 0.83 | 7500 |
| **weighted avg** | 0.83 | 0.83 | 0.83 | 7500 |

**Table 16**

Comparing accuracy for ML methods.

| **ML Models** | **Accuracy** |
| --- | --- |
| LR | 54.5 |
| KNN | 87.5 |
| SVM | 75.5 |
| RF | 94.5 |
| NB | 46.5 |
| Adaboost | 59.5 |
| Gradiant Boosting | 83.5 |
| MLP Classifier | 82.5 |
