# Supplementary material
Source: Research Square preprint supplement (doi:10.21203/rs.3.rs-10283467/v1)
Supplement: Supplementary file 2 [file d722d3ac7bbb5261c81a222a.docx]

Highlights for a Review on Liver Cirrhosis

- Liver cirrhosis is characterized by nodules and progressive deterioration of liver function. The primary etiologies include chronic alcohol consumption, persistent hepatitis B or C infection, metabolic-associated steatotic liver disease (MASLD), autoimmune liver disorders, and certain genetic mutations.
- Early identification of cirrhosis using liver function tests, imaging, non-invasive fibrosis markers, or biopsy can significantly improve patient outcomes. Timely detection allows clinicians to address underlying causes, begin hepatoprotective therapies, monitor for complications, and refer patients to specialists. These actions may slow disease progression and improve long-term prognosis.
- Machine learning techniques support early prediction and classification of liver cirrhosis by identifying patterns in clinical and laboratory data. For example, a recent study used a random forest algorithm to analyze routine blood tests and accurately detect early-stage cirrhosis in asymptomatic patients. These applications highlight the potential of machine learning to enable earlier diagnosis and intervention.
- Common machine learning methods include summarizing, random forests, support vector machines, k-nearest neighbors, gradient boosting, and neural networks. Each method offers specific advantages for medical data analysis. Logistic regression is easy to interpret. Decision trees and random forests manage complex relationships and missing data effectively. Support vector machines are suitable for high-dimensional data. Neural networks model complex patterns, while naïve Bayes provides quick, simple predictions (Simon & Aliferis, n.d.). The choice of method depends on complexity, interpretability, and clinical context.
- Selecting relevant features, conducting thorough data preprocessing, and addressing class imbalance are essential to improve predictive accuracy.
- Model  is calculated using metrics such as accuracy, precision, recall, F1 score, ROC AUC, and confusion matrices (Enhanced Preprocessing Approach Using Ensemble Machine Learning Algorithms for Detecting Liver Disease, 2020). Early detection of cirrhosis allows for prompt treatment, reduces complications, and supports individualized care. Future research should use multicenter datasets, develop transparent and interpretable artificial intelligence tools, and validate results across diverse populations. Combining imaging, laboratory, and genetic data may further improve diagnostic accuracy. These points highlight the need for methodological rigor in feature selection and algorithm choice for early cirrhosis detection using machine learning.
- This review highlights key performance metrics and addresses ongoing research challenges in early diagnosis and clinical decision support.
